# Supplementary material for: CD73 Overexpression Promotes Progression and Recurrence of Papillary Thyroid Carcinoma
Source: MDPI journal article supplement (doi:10.3390/cancers12103042), 2020-10-19
Supplement: s1 [file s1]

## Supplementary Materials

# CD73 Overexpression Promotes Progression and Recurrence of Papillary Thyroid Carcinoma

Young Mun Jeong, Haejin Cho, Tae-Min Kim, Yourha Kim, Sora Jeon, Andrey Bychkov and Chan Kwon Jung

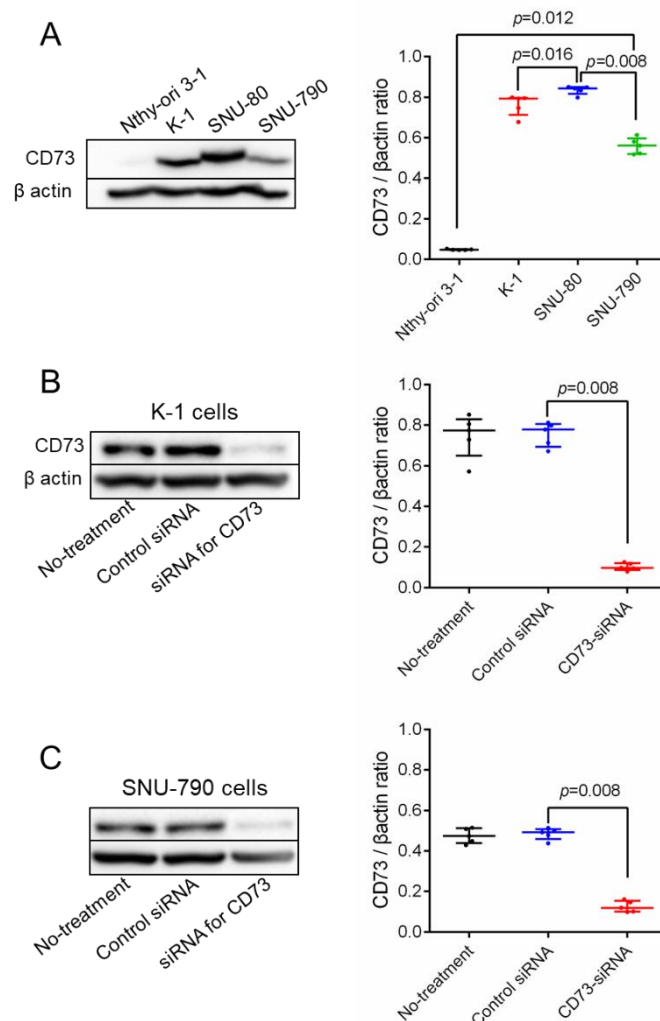

**Figure S1.** Densitometric analysis of CD73 expression on Western blot assays shown in Figure 3. **(A)** The expression of CD73 expression in papillary thyroid carcinoma (K-1 and SNU-790) and anaplastic thyroid carcinoma (SNU-80) cell line compared to that in a normal thyroid (Nthy-ori 3-1). **(B and C)** Inhibition of CD73 expression by siRNA in K-1 and SNU-790 cells. The intensities of protein bands were calculated using GeneTools Analysis Software (version 3.7, Syngene, Cambridge, UK). Data are shown as median and interquartile range from five independent experiments.

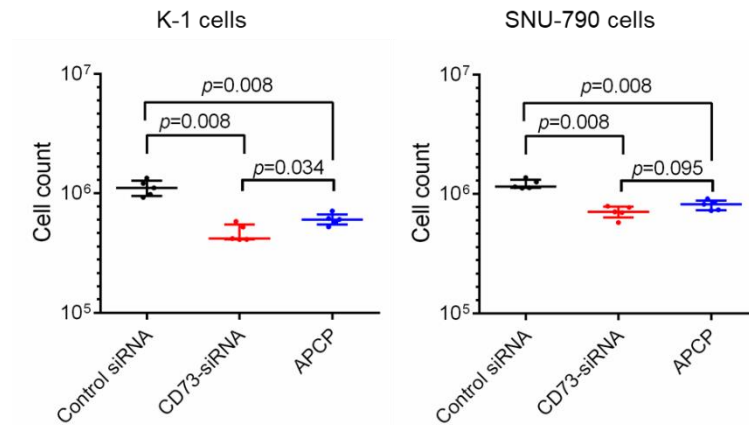

**Figure S2.** Downregulation of CD73 expression inhibits cell proliferation. Cell proliferation was measured using a cell counting after treatment with CD73-siRNA and APCP in both K-1 and SNU-790 cells. The number of viable cells was counted using a hemocytometer.

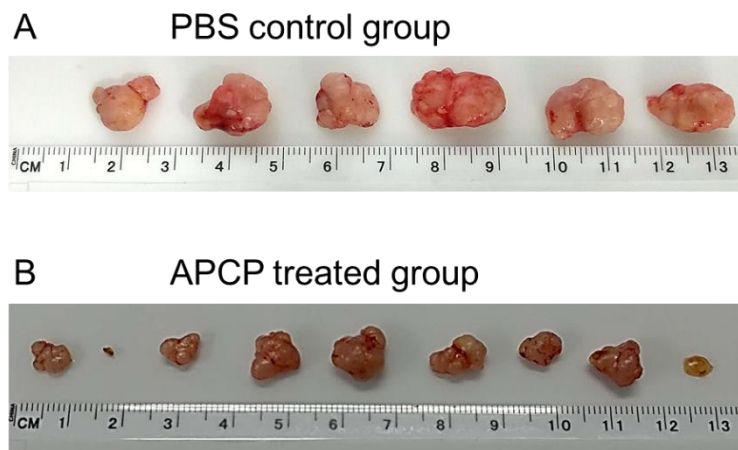

**Figure S3.** Photographs of gross specimens of tumors in BALB/c nude mice shown in Figure 6A.

Figure 3A and Figure S1A

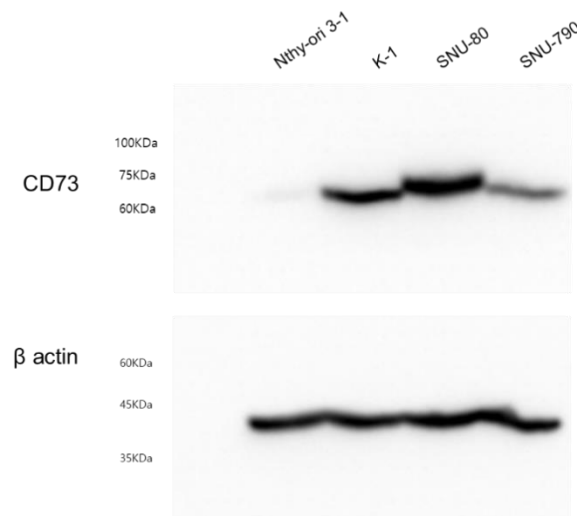

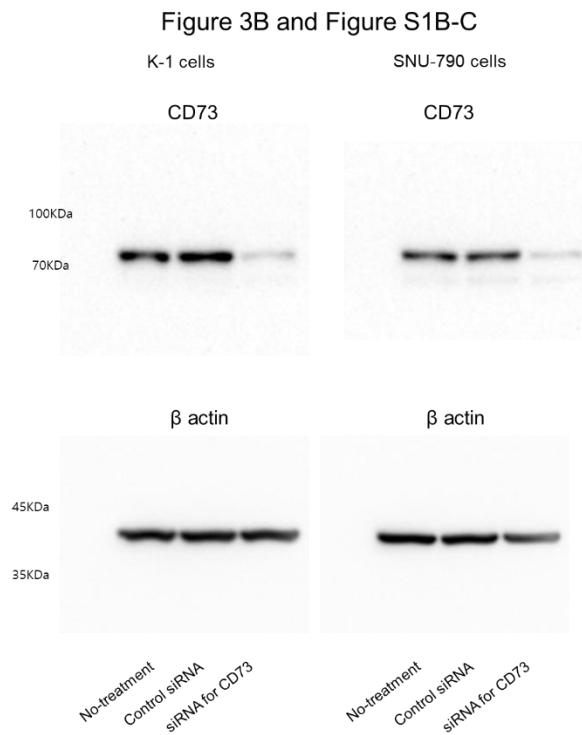

**Figure S4.** Detail information about Figure 3 and Figure S1.

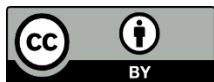

© 2020 by the authors. Licensee MDPI, Basel, Switzerland. This article is an open access article distributed under the terms and conditions of the Creative Commons Attribution (CC BY) license (<http://creativecommons.org/licenses/by/4.0/>).
